# Supplementary material for: User-experience testing of an evidence-to-decision framework for selecting essential medicines
Source: PubMed Central journal article supplement (PMC10783770; doi:10.1371/journal.pgph.0002723), 2024-01-11
Supplement: pgph.0002723.s005.pdf [file pgph.0002723.s005.pdf]

1  
2  
3

Supplementary 5 Appendix: Respondent characteristics

| <b>INTERVIEWEE</b> | <b>GENDER</b> | <b>ROLE</b>                         | <b>WHO REGION OF WORK</b> |
|--------------------|---------------|-------------------------------------|---------------------------|
| <b>1</b>           | M             | WHO Staff                           | EURO                      |
| <b>2</b>           | M             | WHO Staff                           | EURO                      |
| <b>3</b>           | F             | MLEM Expert<br>Committee<br>Member  | EURO                      |
| <b>4</b>           | M             | MLEM Expert<br>Committee<br>Member  | PAHO                      |
| <b>5</b>           | M             | MLEM Applicant                      | PAHO                      |
| <b>6</b>           | F             | MLEM Applicant                      | PAHO                      |
| <b>7</b>           | M             | MLEM Applicant                      | PAHO                      |
| <b>8</b>           | F             | MLEM Applicant                      | PAHO                      |
| <b>9</b>           | M             | MLEM Applicant                      | EURO                      |
| <b>10</b>          | M             | MLEM Applicant                      | PAHO                      |
| <b>11</b>          | F             | MLEM Applicant                      | SEARO                     |
| <b>12</b>          | F             | National EML<br>Committee<br>Member | AFRO                      |
| <b>13</b>          | M             | National EML<br>Committee<br>Member | EMRO                      |

4  
5
